# Supplementary material for: Clinical practice guidelines and expert consensus statements on rehabilitation for patients with COVID-19: protocol for a systematic review
Source: PubMed Central journal article supplement — BMJ Open. 2022 Aug 4;12(8):e060767. doi: 10.1136/bmjopen-2022-060767 (PMC9358617; doi:10.1136/bmjopen-2022-060767), 2022-08-04
Supplement: bmjopen-2022-060767supp002.pdf [file bmjopen-2022-060767supp002.pdf]

## PRISMA 2020 flow diagram for new systematic reviews which included searches of databases and registers only

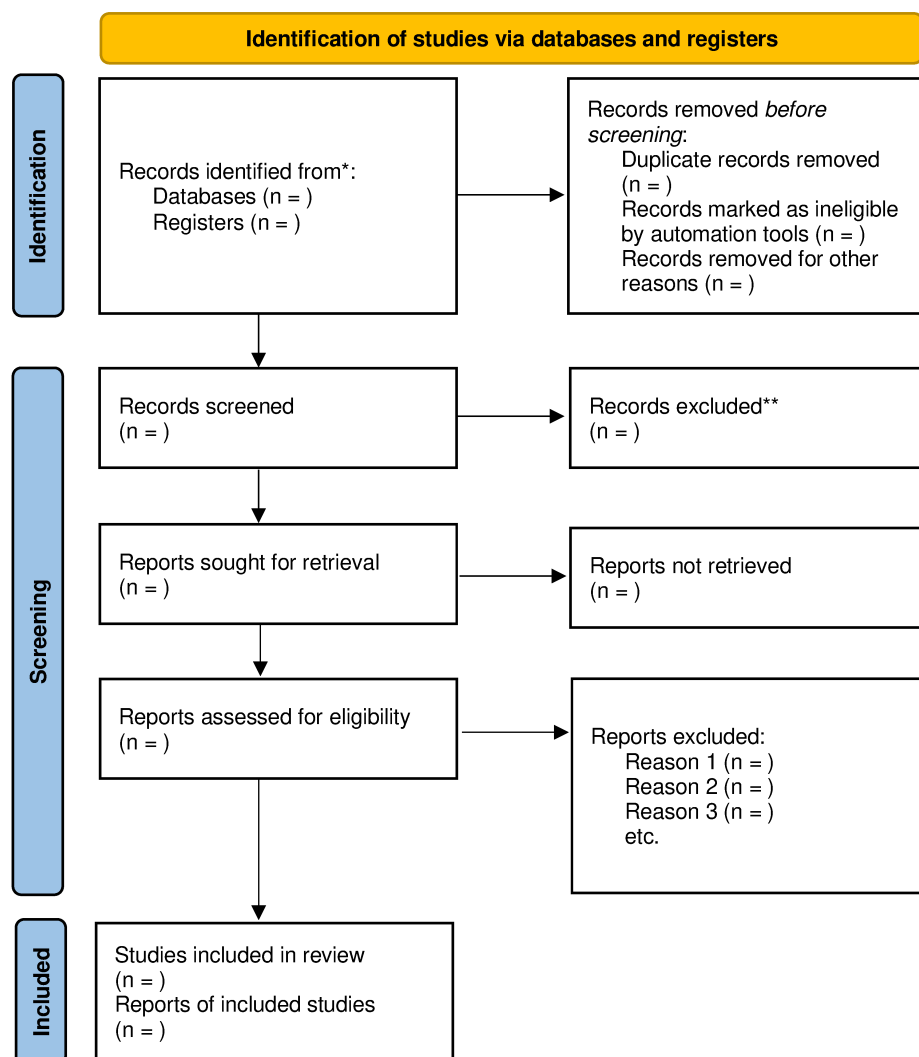

\*Consider, if feasible to do so, reporting the number of records identified from each database or register searched (rather than the total number across all databases/registers).

\*\*If automation tools were used, indicate how many records were excluded by a human and how many were excluded by automation tools.

From: Page MJ, McKenzie JE, Bossuyt PM, Boutron I, Hoffmann TC, Mulrow CD, et al. The PRISMA 2020 statement: an updated guideline for reporting systematic reviews. *BMJ* 2021;372:n71. doi: 10.1136/bmj.n71

For more information, visit: <http://www.prisma-statement.org/>
